# Supplementary material for: Implementation, mechanisms of impact and key contextual factors involved in outcomes of the Modification of Diet, Exercise and Lifestyle (MODEL) randomised controlled trial in Australian adults: protocol for a mixed-method process evaluation
Source: HighWire-hosted journal article supplement (doi:10.1136/bmjopen-2019-036395), 2020-11-01
Supplement: bmjopen-2019-036395supp001_data_supplement.pdf [file bmjopen-2019-036395supp001_data_supplement.pdf]

## INTERVIEW QUESTIONS

1. Tell me about how you came to be involved in this study.

Prompt

- Tell me more about that, what was it that interested you?
- Why was that?

2. What do you remember about the videos?

3. What did you think of the 3 videos (Heart Foundation, Cardiovascular and D&L) and information booklet provided to you in the counselling session (E.g. duration, clarity of the language used and expressions, etc.)?

4. Please describe your initial reaction to seeing your own level of advanced blood vessel disease (AAC) for the first time (i.e., the image, illustrative representation and information about your cardiovascular disease status)?

5. What was the immediate effect, if any, that this image/information had on you?

Prompt

- How did it make you feel?
- Can you please explain why and how?

6. What was the immediate effect, if any, that the dietary and lifestyle counselling had on you?

Prompt

- How did it make you feel?
- Can you please explain why and how?

7. How has the image/information on your own level of advanced blood vessel disease changed your behaviour?

Prompt

- If so, why and how?
- What was the easiest/hardest part of making the changes, and why?
- In what ways?
- Can you share with me some examples?

8. Did you share your results with healthcare providers?

Prompt

- If so, what did they say and how did it make you feel?
- Can you please explain why and how?
- If you haven't discussed it yet, are you planning on discussing the results with your GP?

9. Did you share your results with family and friends?

Prompt

- If so, what did they say and how did it make you feel?
- Can you please explain why and how?

10. So what or which specific parts of the diet and lifestyle video were helpful to you?

Prompt

- What recommendations do you have for improving its delivery?

11. What other elements of the consultation (i.e., non-AAC materials, such as BP, lipids, and interaction with the counsellor, booklet) influenced your feelings or behaviour?

Prompt

- If so, how and why, and if not, why not?
- What element of the consultation has influenced you most (if any)?

12. What other information provided was helpful for you?

How?

Prompt

- What recommendations do you have about how best to present the advanced blood vessel disease image/information?
- What questions did you have after being presented with the image/information (if any)?

13. Is there anything else you wanted to say about the duration, clarity of the language used and expressions in the 3 videos, the counselling sessions and any other information in this study?
